# Supplementary material
Source: PubMed Central journal article supplement (PMC2536526)
Supplement: NIHMS62057-supplement-si20061217_054.pdf [file NIHMS62057-supplement-si20061217_054.pdf]

## Supporting Information Section

### Additional data for the characterization of the peak J compound (21)

The MS analysis:

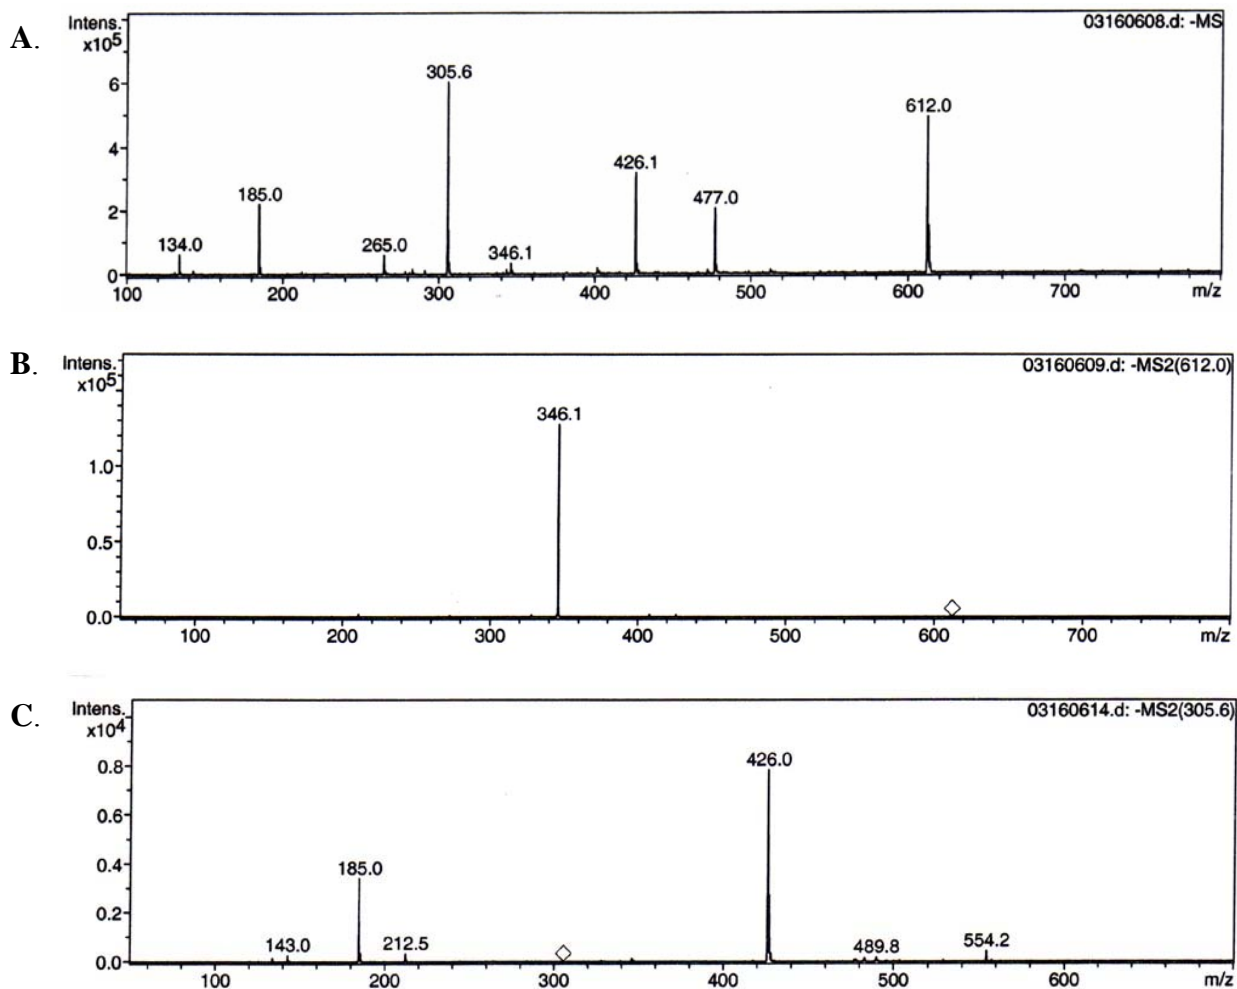

**Figure S1:** MS analysis of the compound 21. A: Negative mode ESI-MS data of the compound 21. B: Fragmentation analysis on the species with m/z = 612. C: Fragmentation analysis of the species with m/z = 305.6

## Explanation of the fragmentation patterns:

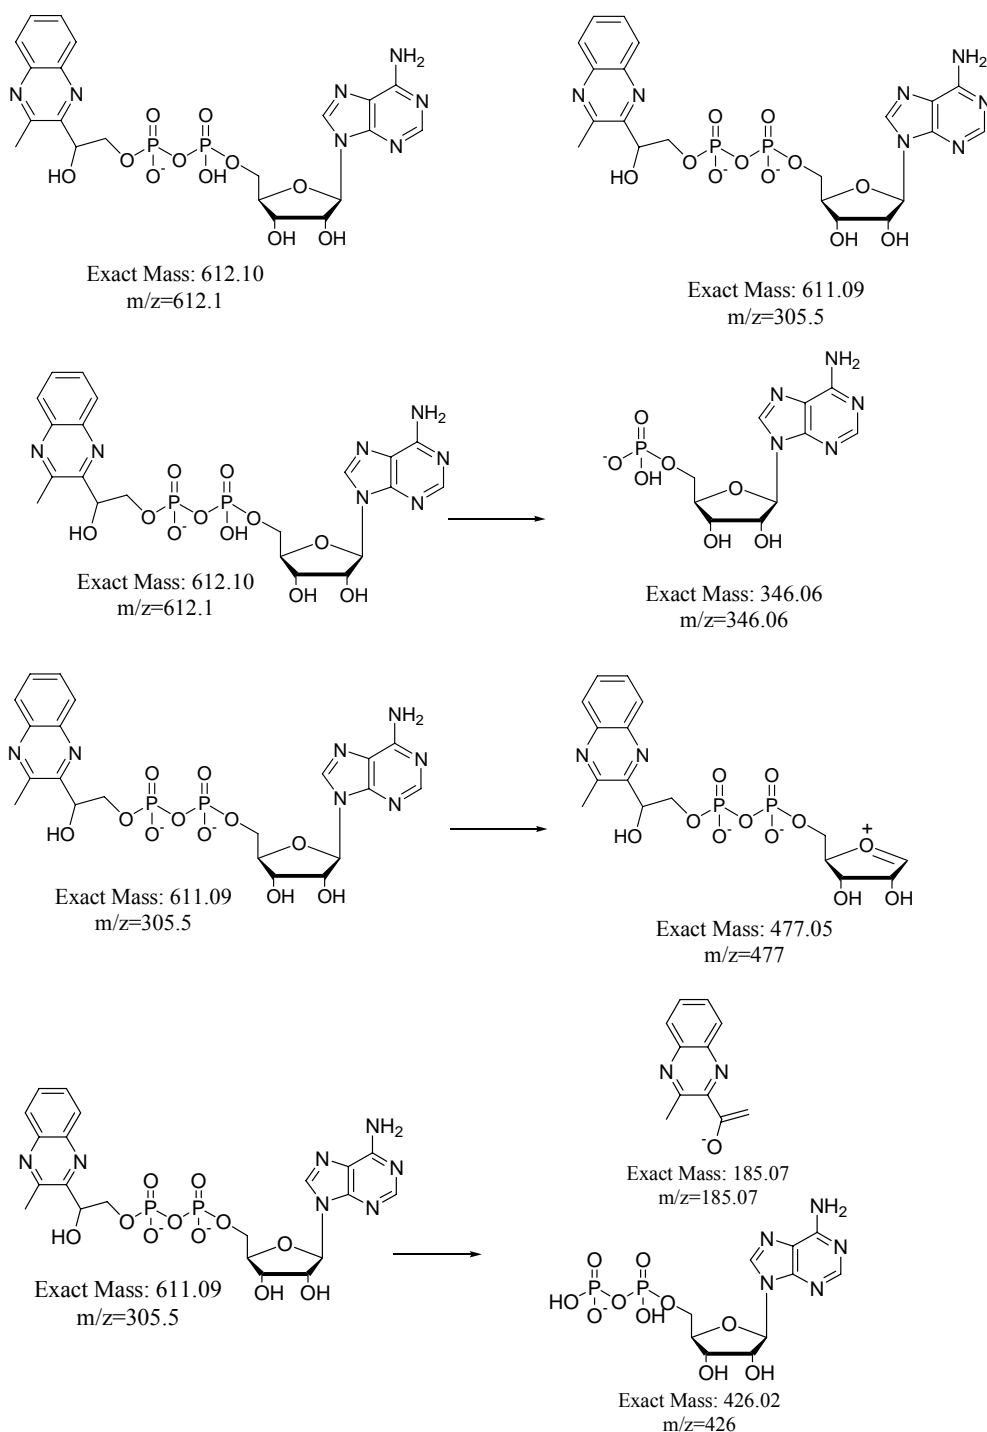

**Figure S2:** Explanation of the fragmentation patterns of the mono- and di-anionic compound **21**.

The major peak obtained is the one with  $m/z=305.6$ , corresponding to the dianionic compound **21**. The monoanionic species with  $m/z = 612$  is also visible. Other than these peaks with  $m/z= 426$ , 477 and 185 are also observed, which are fragmentation products of the dianionic **21** (thermal degradation under spraying condition). The fragmentation patterns of both the mono- and the di-anionic species are explained in figure S2.

## NMR analysis of the compound 21:

### COSY:

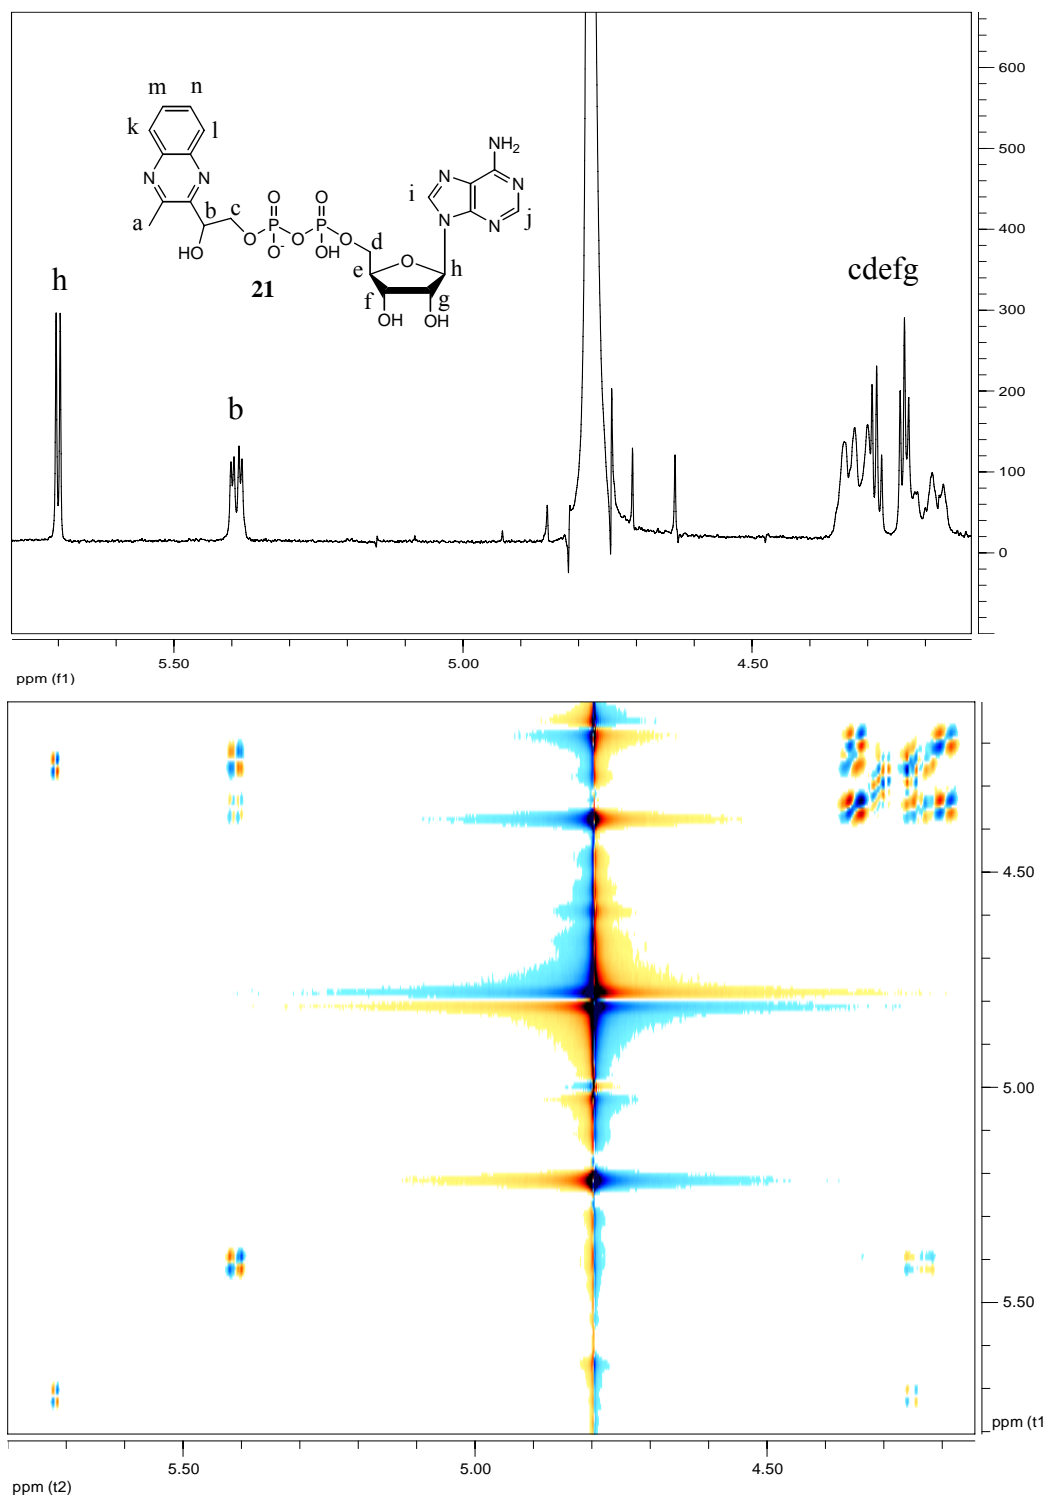

**Figure S3:** The COSY analysis of the compound 21.

The COSY analysis showed the presence of two minor impurities: glycerol and lactic acid. It also identified that the protons c d e f g (figure S3) are clustered into a multiplet between 4.1 and 4.4 ppm.

**Magnified image of the aromatic region in the COSY spectra:**

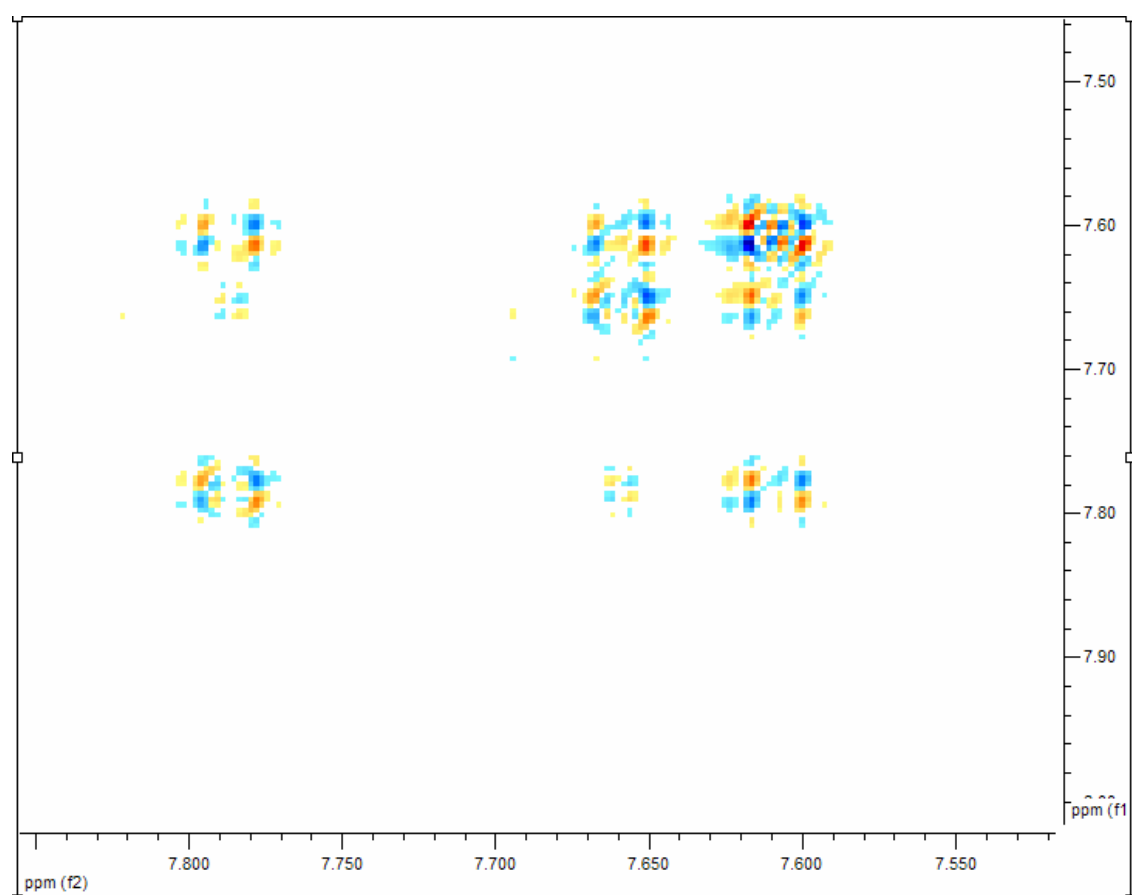

**Figure S4:** Magnified COSY correlation diagram

**ROESY:**

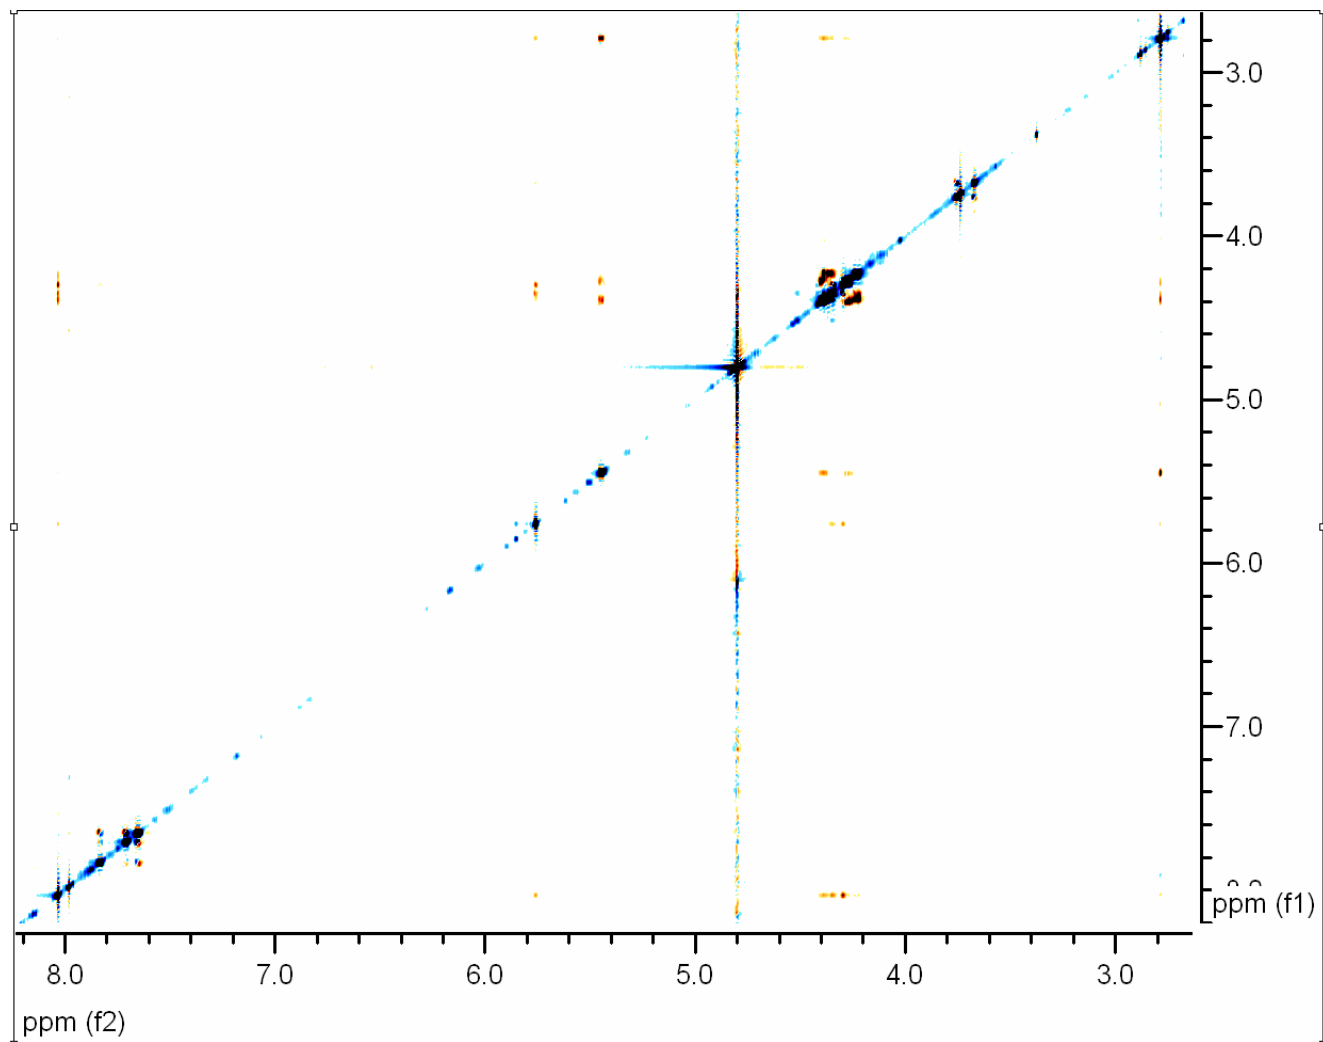

**Figure S5:** Phase-sensitive ROESY (mixing time 300 ms) of the compound **21**

**HMQC:**

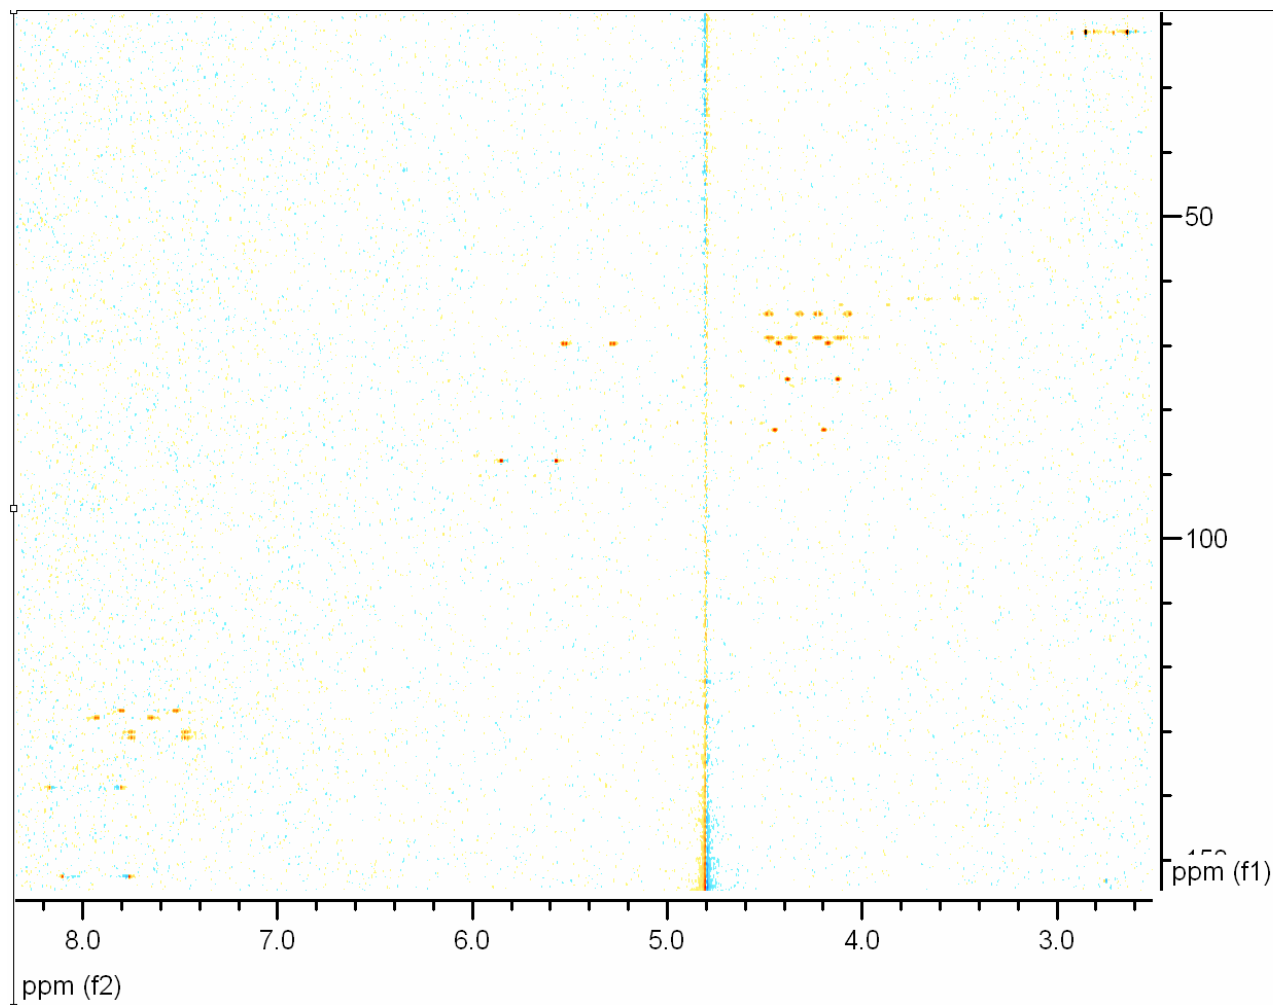

**Figure S6:** ( $^1\text{H}$ - $^{13}\text{C}$ )-coupled phase-sensitive non-gradient HMQC analysis of the compound **21**

**HMBC:**

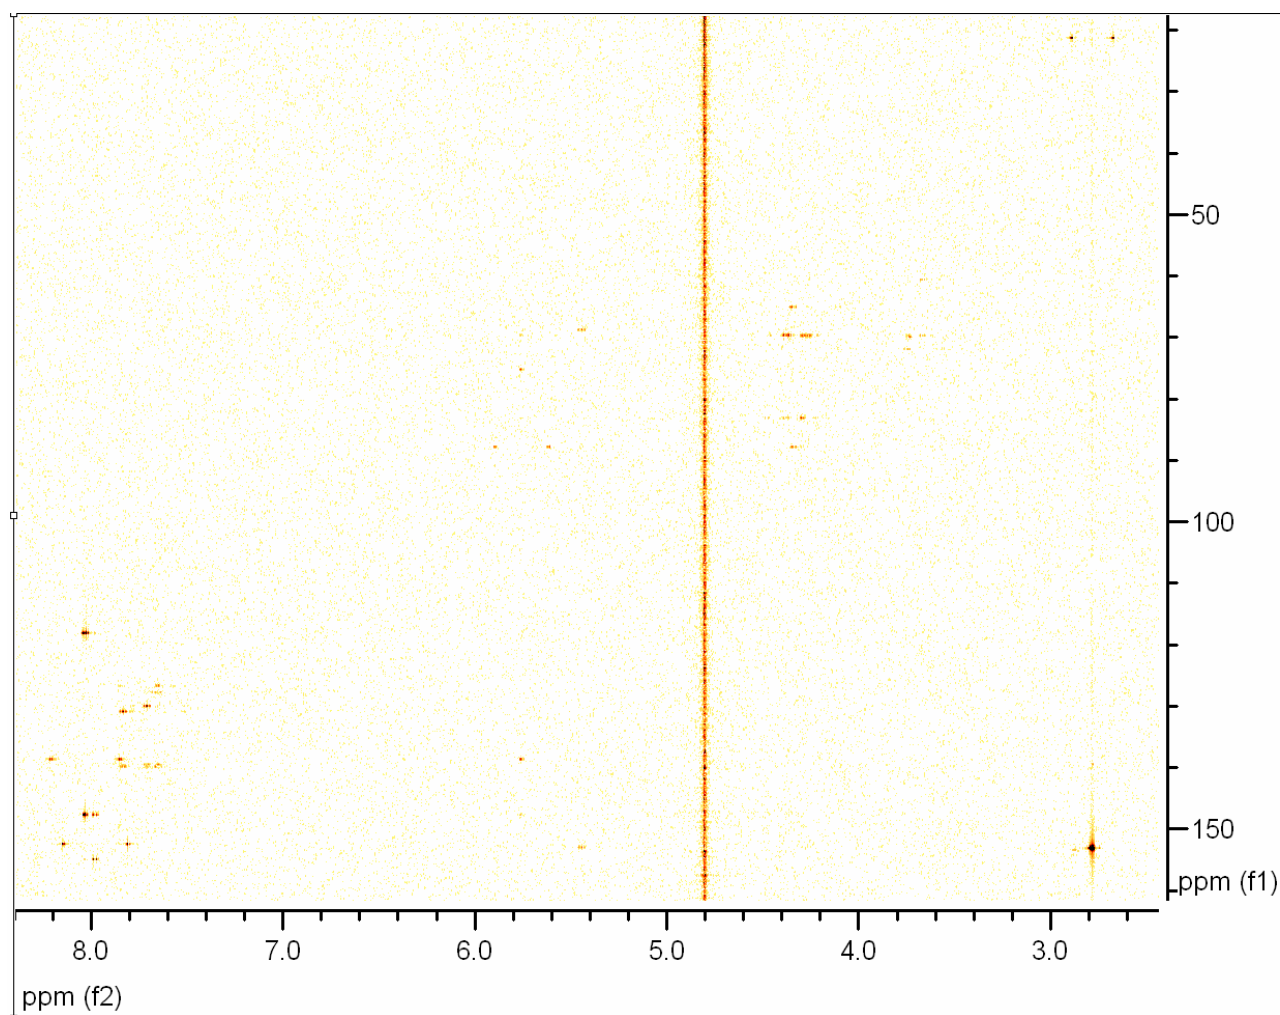

**Figure S7:** Non-gradient (<sup>1</sup>H-<sup>13</sup>C) HMBC analysis of the compound **21**

**Magnified images of the different regions of the HMBC correlation diagram:**

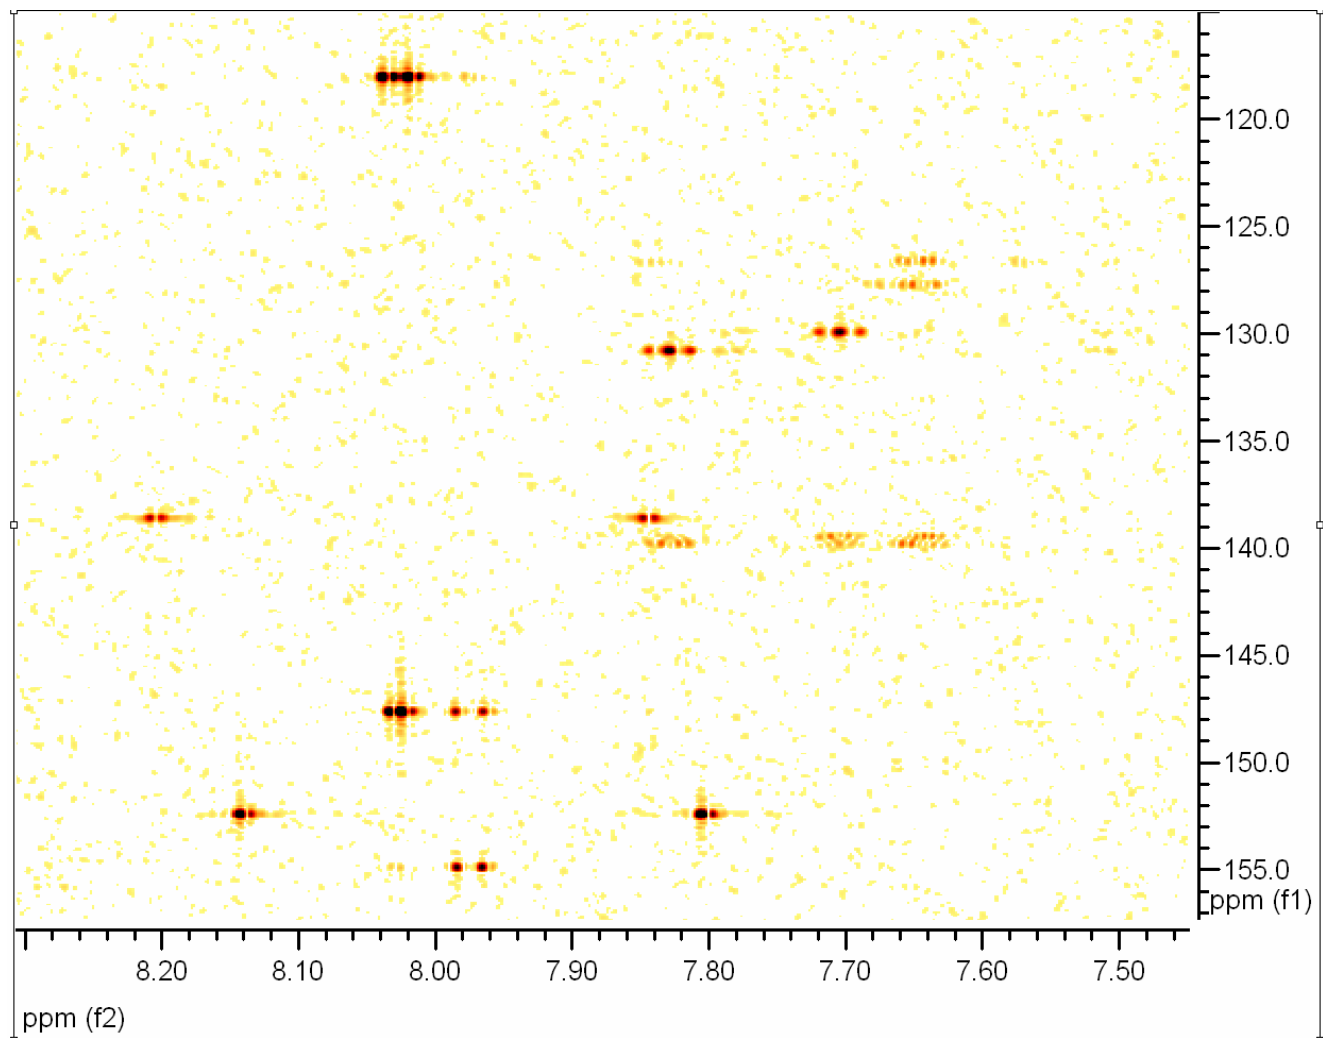

**Figure S8:** Magnified HMBC correlation diagram



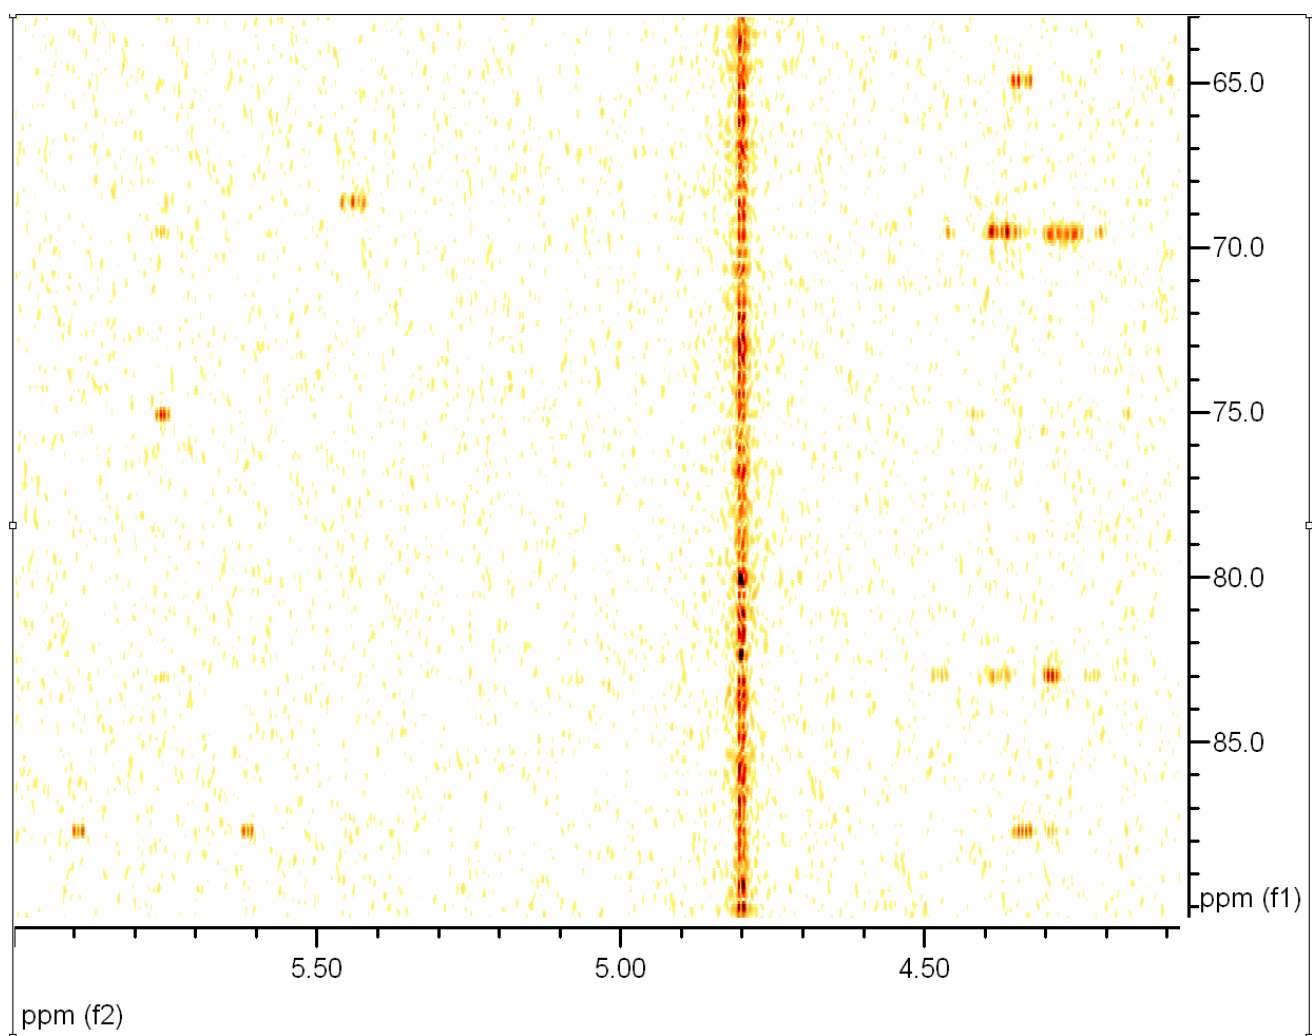

**Figure S9:** Magnified HMBC correlation diagram

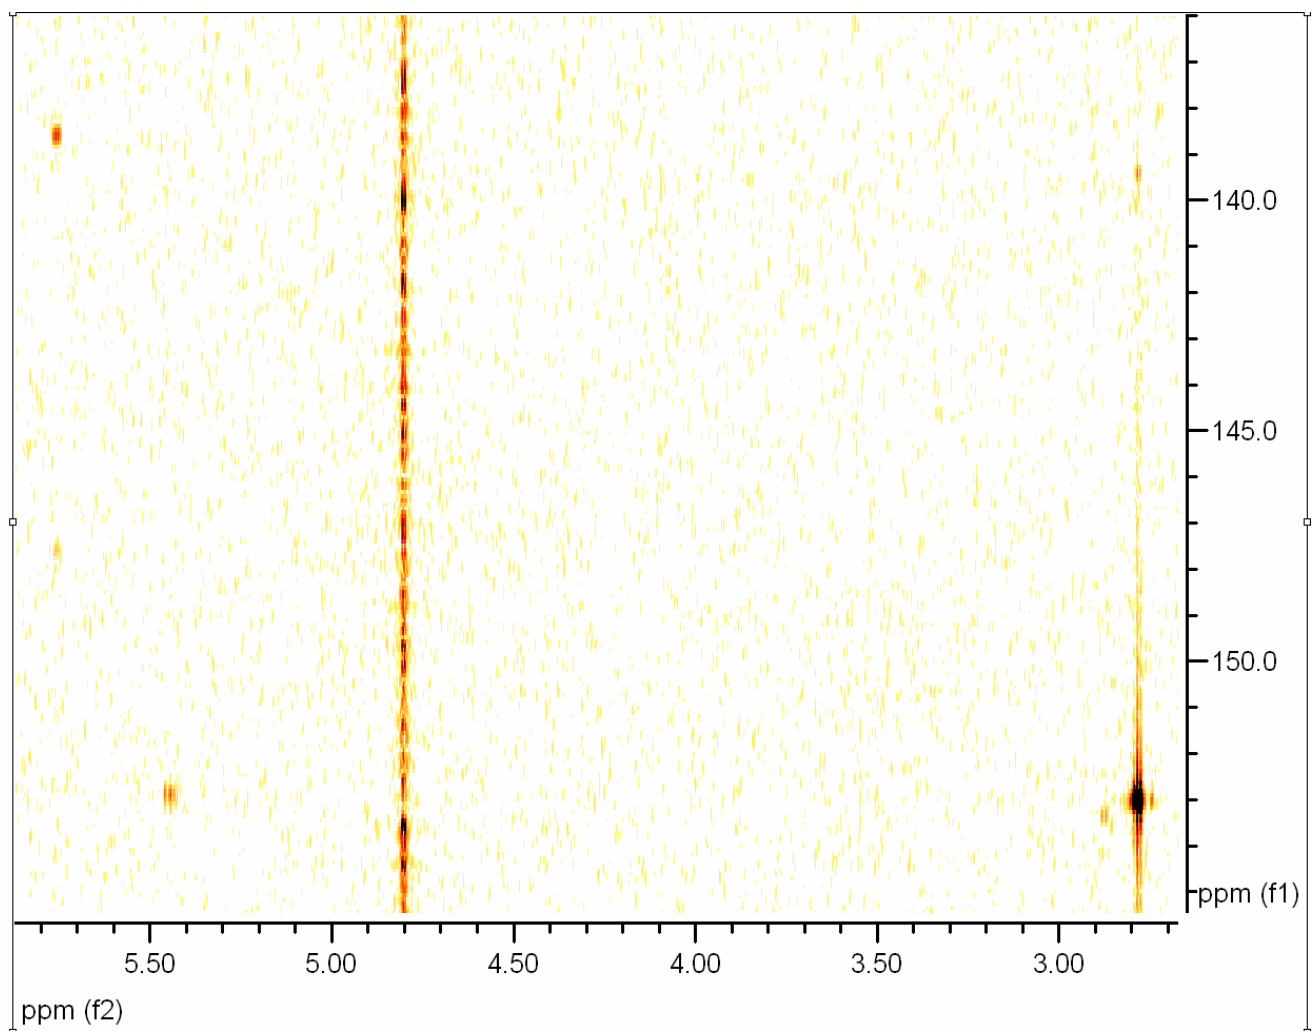

**Figure S10:** Magnified HMBC correlation diagram

Summary of all the chemical shifts and the correlations deduced from the NMR spectroscopic analysis of compound 21:

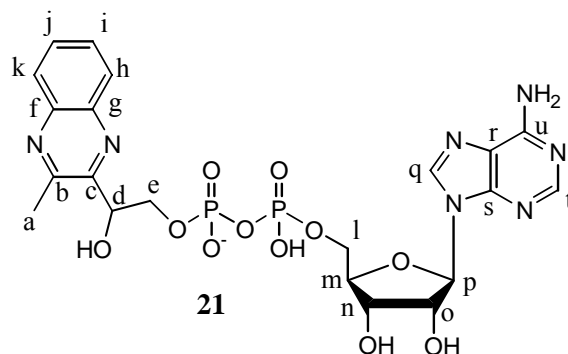

| Position | $\delta^{13}\text{C}$ [ppm] | $\delta^1\text{H}$ [ppm] | Relevant HMBC Correlations | Relevant COSY Correlations | Relevant ROESY Correlations |
|----------|-----------------------------|--------------------------|----------------------------|----------------------------|-----------------------------|
| a        | 21.2                        | 2.74                     | C-b, C-c, C-f              | -                          | H-d, H-e                    |
| b        | 153.06                      | -                        | -                          | -                          | -                           |
| c        | 152.91                      | -                        | -                          | -                          | -                           |
| d        | 69.7                        | 5.4                      | C-c, C-e                   | H-e                        | H-a, H-e                    |
| e        | 68.7                        | 4.35<br>4.24             | C-d                        | H-d                        | H-d, H-a                    |
| f        | 139.4                       | -                        | -                          | -                          | -                           |
| g        | 139.8                       | -                        | -                          | -                          | -                           |
| h        | 127.7                       | 7.78                     | C-g, C-i                   | H-i, H-j                   | -                           |
| i        | 130.8                       | 7.57-7.62                | C-f, C-g, C-h, C-k         | H-h, H-j, H-k              | -                           |
| j        | 129.9                       | 7.57-7.62                | C-f, C-g, C-h, C-k         | H-h, H-i, H-k              | -                           |
| k        | 126.6                       | 7.66                     | C-j, C-f                   | H-i, H-j                   | -                           |
| l        | 65.1                        | 4.35, 4.19               | C-m                        | H-m                        | -                           |
| m        | 83.1                        | 4.31                     | C-l, C-p                   | H-l, H-n                   | -                           |
| n        | 69.6                        | 4.3                      | -                          | H-o, H-m                   | -                           |
| o        | 75.2                        | 4.25                     | C-p                        | H-p, H-n                   | -                           |
| p        | 88.0                        | 5.71                     | C-n, C-o, C-q, C-s         | H-o                        | -                           |

|   |       |      |          |   |   |
|---|-------|------|----------|---|---|
| q | 138.5 | 7.96 | C-r, C-s | - | - |
| r | 118.1 | -    | -        | - | - |
| s | 147.7 | -    | -        | - | - |
| t | 152.5 | 7.91 | C-s, C-u | - | - |
| u | 154.9 | -    | -        | - | - |

**Further characterization of ADPrI 4 (ADPrI 4 peak F):**

Purified ADPrI 4 was reduced with NaBD<sub>4</sub> and the corresponding product of reduction was purified by HPLC and was characterized by NMR (<sup>1</sup>H and COSY).

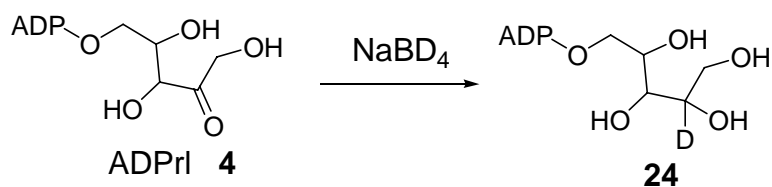

**Figure S11:** Reduction of ADPrI 4 by NaBD<sub>4</sub> to stable deuterated reduction product 24.

**NMR analysis of compound 24:**

# <sup>1</sup>H NMR:

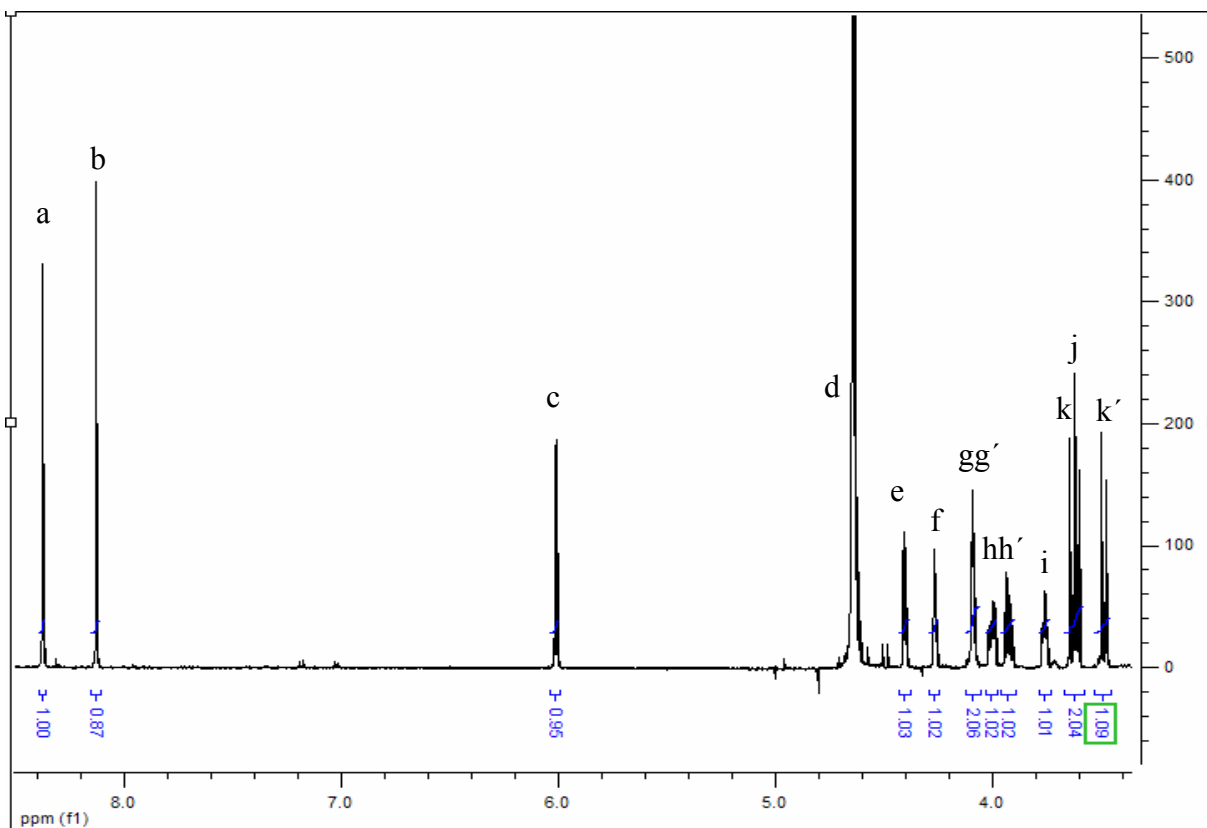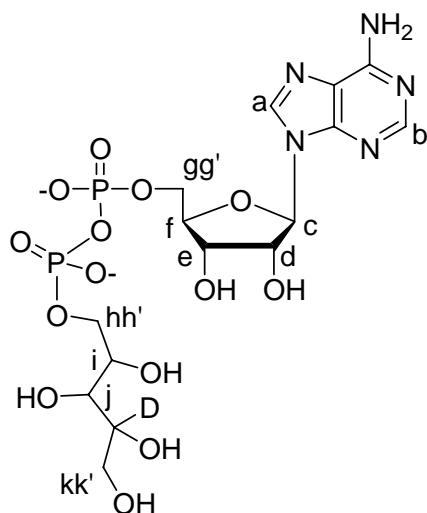

**Figure S12:** <sup>1</sup>H NMR of compound **24**. The assignments are based on the COSY experiment. The peak **d** is hidden under the water peak and is revealed from the COSY experiment.

COSY analysis:

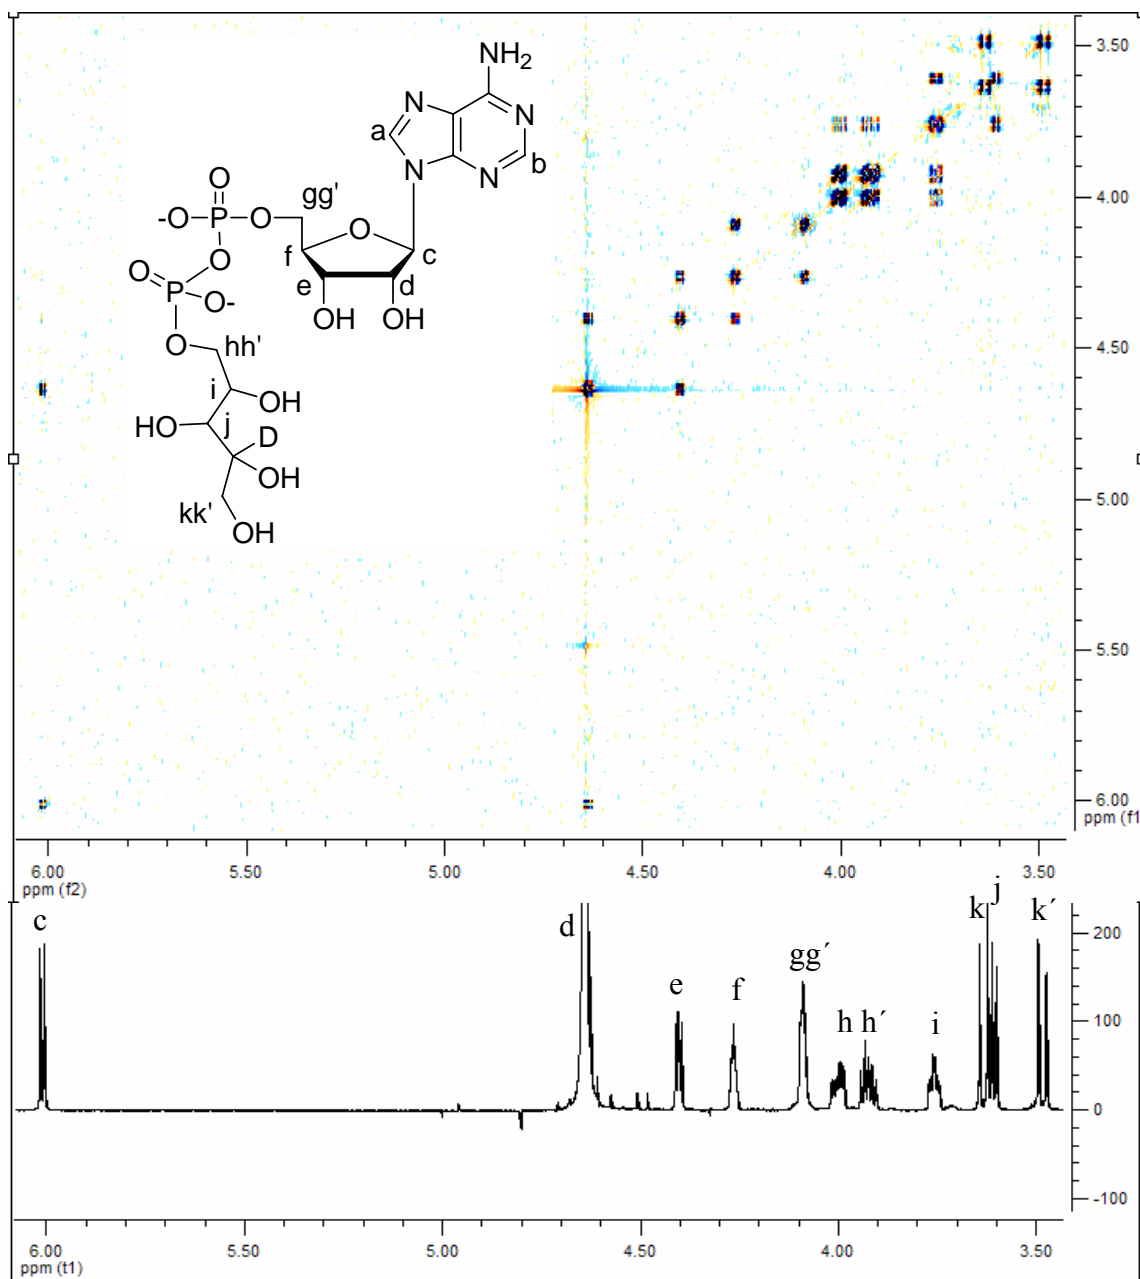

**Figure S13:** COSY analysis of the compound 24.

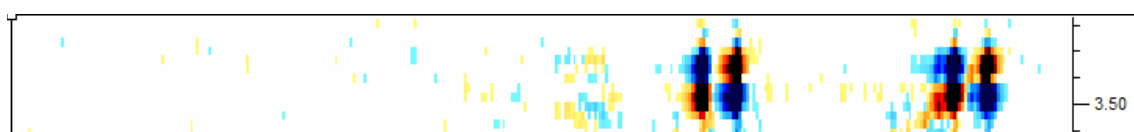

**Figure S14:** Expanded region of the COSY spectrum of the compound **24**.
